# Supplementary material for: Simplifying the Centrolene buckleyi complex (Amphibia: Anura: Centrolenidae): a taxonomic review and description of two new species
Source: PeerJ. 2024 Aug 20;12:e17712. doi: 10.7717/peerj.17712 (PMC11348905; doi:10.7717/peerj.17712)
Supplement: Supplemental Information 1 [file peerj-12-17712-s001.xlsx]

## Sheet: Meseaurements
	Species	Museum Number	SVL	FEL	TL	FL	HL	HW	IOD	ED	TD	AL	HAL	FI	FII	FIII	TIII	IND	END
1	C. buckleyi	MZUTI 763	29.66	15.82	16.72	15.68	6.24	9	3.56	2.96	0.88	6.31	11.01	4.84	7.49	1.87	1.77	2.28	1.81
2	C. buckleyi	ZSFQ 4420	26.44	16.85	17.71	15.21	6.54	8.73	3.55	3.03	0.96	6.3	10.7	5.5	7.2	2.33	2.11	2.34	2.06
3	C. buckleyi	DHMECN 13376	28.7	17.43	18.34	15.05	6.84	8.67	3.41	3.08	1.16	6.96	10.84	5.67	7.38	2.04	1.63	2.1	1.89
4	C. buckleyi	ZSFQ 4421	28.89	15.82	16.1	15.74	5.97	8.77	3.11	3.09	1	5.87	11.11	5.89	7.31	1.85	1.51	2.31	2.14
5	C. buckleyi	CJ 2171	27.98	14.83	15.54	13.96	6.81	8.03	3.09	3.16	0.88	5.72	10.67	4.55	6.66	1.6	1.18	2.02	1.69
6	C. buckleyi	CJ 9789	27.2	14.14	14.7	13.1	7.11	7.8	2.83	2.71	0.66	5.52	9.32	3.81	5.63	1.67	1.21	1.82	1.55
7	C. buckleyi	EPN 13218	26.53	13.99	16.63	13.26	6.37	7.01	2.91	2.53	0.89	5.3	8.49	4.87	5.35	1.58	1.47	1.95	1.73
8	C. buckleyi	EPN 2703	26.92	14.68	14.79	13.42	6.59	7.82	2.65	2.86	1.04	6.41	9.81	4.59	6.31	1.9	1.67	2.31	1.85
9	C. buckleyi	EPN 3217	26.94	14.64	15.01	13.66	7	7.58	2.91	2.48	0.89	5.27	9.08	4.43	5.9	1.49	1.19	1.74	1.67
10	C. buckleyi	EPN 3210	27.13	14.79	15.03	13.71	7.2	8.01	3.2	2.83	0.97	5.74	9.12	5.02	5.97	1.53	1.23	2.01	1.78
11	C. buckleyi	EPN 3211	29.19	15.24	14.32	13.99	7.46	8.37	3.6	3.21	1.23	5.93	10.21	5.39	6.92	2.25	1.8	2.33	2.17
12	C. buckleyi	EPN 3214	27.31	13.97	14.4	14.63	6.12	7.99	3.09	2.4	0.96	5.89	9.26	4.09	6.01	1.99	1.62	2.18	1.99
13	C. buckleyi	EPN 3213	27.43	14.24	14.95	14.69	6.59	8.01	3.1	2.69	1.05	5.92	9.93	4.12	6.2	2.01	1.67	2.38	2.01
14	C. buckleyi	EPN 3212	27.09	14.16	14.33	13.39	6.32	7.64	2.85	2.35	0.86	4.9	9.14	4.47	5.83	1.68	1.43	2.15	1.67
15	C. buckleyi	EPN 3215	26.13	14.06	14.28	12.42	5.74	7.55	2.74	2.2	0.73	4.87	8.69	4.35	6.62	1.48	1.37	2.02	1.57
16	C. buckleyi	EPN 8926	28.3	16.09	15.32	14.33	6.89	8.48	3.08	2.91	1.06	5.86	9.75	4.76	6.69	1.76	1.41	2.21	1.92
17	C. buckleyi	EPN 8927	32.5	16.21	16.7	15.87	7.64	9.68	3.72	3.19	1.17	6.19	11.77	5.56	6.57	2.95	1.88	2.75	2.01
18	C. elisae sp nov	MZUTI 0084	24.54	13.24	14.58	12.02	5.59	6.96	2.75	2.46	0.74	5.21	8.52	3.93	5.37	1.45	1.4	1.79	1.48
19	C. elisae sp nov	MZUTI 0085	24.49	13.05	14.53	11.83	5.98	7.55	2.87	2.45	0.45	5.38	9.57	4.2	5.75	1.54	1.44	1.75	1.51
20	C. elisae sp nov	MZUTI 0083	24.88	13.22	14.7	11.89	6.13	7.42	2.82	2.4	0.7	5.45	9.29	3.7	5.79	1.49	1.42	1.79	1.58
21	C. elisae sp nov	ZSFQ 5368	25.3	14.7	15.1	12.54	6.13	7.88	2.53	2.56	0.81	4.92	9.62	3.91	5.86	1.72	1.54	1.82	1.64
22	C. elisae sp nov	ZSFQ 5369	22.93	13.06	13.85	11.97	5.46	6.88	2.31	2.36	0.76	4.65	9.03	3.59	5.34	1.69	1.49	1.59	1.45
23	C. elisae sp nov	ZSFQ 4428	23.85	13.94	14.74	12.9	5.88	7.82	2.8	2.56	0.77	4.52	9.87	4.4	6.24	1.93	1.62	2.07	1.75
24	C. marcoreyesi sp nov	ZSFQ 4417	24.69	14.1	15.68	13.34	6.12	7.63	2.9	2.58	0.91	5.74	9.48	4.94	6.23	1.28	1.13	2.04	1.69
25	C. marcoreyesi sp nov	ZSFQ 4418	25.93	13.68	15.48	13.81	6.18	7.59	2.93	2.72	0.88	5.08	9.74	5.25	6.23	1.69	1.23	2.09	1.81
26	C. marcoreyesi sp nov	MUTPL-A 00272	27.01	14.21	15.79	13.43	6.32	8.25	3.04	2.29	0.45	4.98	10.07	5.37	5.95	0.81	1.6	2.2	1.98
27	C. marcoreyesi sp nov	MUTPL-A 00271	26.36	13.65	15.27	13.07	5.99	8.1	2.95	2.11	0.39	4.93	9.53	4.87	5.85	1.36	1.41	2.02	1.74
28	C. marcoreyesi sp nov	CJ 11364	26.75	15.14	15.79	13.64	6.74	8.37	3.17	2.81	0.89	4.28	9.85	4.17	5.83	1.4	1.33	1.95	1.72
29	C. marcoreyesi sp nov	CJ 11564	24.45	14.99	15.34	13	5.78	7.89	2.4	2.63	0.64	5.11	9.48	4.74	6.03	1.46	1.31	1.74	1.66
30	C. marcoreyesi sp nov	CJ 11363	27.09	14.65	15.86	13.73	5.46	8.27	3.16	2.57	1.09	4.89	9.63	4.45	6.08	1.89	1.69	1.93	1.86

## Sheet: Residuals
	Species/Residuals (measurements)	1	2	3	4	5	6	7	8	9	10	11	12	13	14	15	16
1	C. buckleyi	0.100398	0.626295	0.651236	-0.717685	0.273402	0.157178	-0.00958398	-0.164109	0.28616	0.465028	-0.335137	0.738777	-0.174886	0.148779	-0.0613242	-0.162494
2	C. buckleyi	2.34904	2.40038	1.71693	0.230102	0.817651	0.592367	0.389378	0.117285	0.889773	1.03284	0.909261	1.0377	0.64174	0.631946	0.314794	0.301514
3	C. buckleyi	2.07372	2.48006	0.479082	0.0754439	0.18616	0.139905	0.208492	0.175934	1.1191	0.556737	0.669093	0.804357	0.101437	0.0514625	-0.147078	-0.0186907
4	C. buckleyi	0.391814	0.193794	1.07847	-0.83278	0.238114	-0.186364	0.199081	0.00405011	-0.00710675	0.774941	0.85461	0.699607	-0.109606	-0.0769853	0.0442692	0.218682
5	C. buckleyi	-0.253787	-0.144617	-0.267533	0.190291	-0.271772	-0.0805496	0.362048	-0.0590341	0.0163059	0.583019	-0.320234	0.216042	-0.258821	-0.366525	-0.156393	-0.170838
6	C. buckleyi	-0.648587	-0.794684	-0.755533	0.647208	-0.304532	-0.232709	-0.00826505	-0.230249	-0.0350548	-0.554343	-0.918672	-0.671299	-0.102433	-0.301845	-0.279818	-0.258998
7	C. buckleyi	-0.545017	1.29846	-0.275995	0.0419964	-0.925108	-0.0600764	-0.119816	0.0416559	-0.127377	-1.20169	0.262927	-0.828759	-0.118228	-0.0120554	-0.0840419	-0.034468
8	C. buckleyi	-0.00261742	-0.636503	-0.301995	0.183538	-0.213728	-0.373997	0.17034	0.167263	0.908303	0.0119887	-0.0878545	0.0599117	0.158578	0.170605	0.237671	0.0596118
9	C. buckleyi	-0.0501866	-0.421373	-0.0715333	0.589514	-0.458785	-0.116762	-0.211703	0.0160125	-0.235508	-0.723464	-0.251484	-0.353746	-0.253637	-0.310285	-0.334293	-0.121717
10	C. buckleyi	0.0279057	-0.447639	-0.112149	0.751291	-0.0768309	0.146969	0.118886	0.084129	0.198285	-0.73526	0.304033	-0.318496	-0.23468	-0.278732	-0.0829459	-0.0243452
11	C. buckleyi	-0.301725	-1.65926	-0.81461	0.596868	-0.237748	0.262159	0.288432	0.215287	-0.00427574	-0.206843	0.300163	0.254738	0.257168	0.199676	0.0348172	0.228743
12	C. buckleyi	-0.860217	-1.12147	0.722005	-0.364921	-0.142348	0.0120828	-0.329503	0.0628709	0.313983	-0.644331	-0.658636	-0.311418	0.205384	0.103264	0.0693829	0.173692
13	C. buckleyi	-0.635633	-0.60069	0.724774	0.0809378	-0.152693	0.00549197	-0.0517623	0.145366	0.321116	-0.00704409	-0.650414	-0.143365	0.212094	0.147929	0.257602	0.185716
14	C. buckleyi	-0.586956	-1.1379	-0.413072	-0.120662	-0.436716	-0.197501	-0.357027	-0.0233692	-0.634093	-0.704356	-0.238708	-0.451181	-0.0802501	-0.076954	0.0609811	-0.131687
15	C. buckleyi	-0.323633	-0.954134	-0.925226	-0.507533	-0.283959	-0.174774	-0.408952	-0.0933262	-0.481152	-0.892647	-0.184477	0.514399	-0.173927	-0.0942706	0.0252274	-0.167883
16	C. buckleyi	0.885106	-0.442539	-0.0501486	0.205914	0.0973086	-0.134792	0.0793566	0.100952	0.0953256	-0.424218	-0.168311	0.187515	-0.134262	-0.150753	0.00219143	0.0378942
17	C. buckleyi	-0.584432	-0.0852571	-0.513225	0.110974	0.235245	-0.0754726	-0.0697245	-0.0517366	-0.37504	0.450807	-0.130569	-0.700647	0.590574	0.132508	0.129864	-0.151246
18	C. elisae sp nov	-0.541879	-0.266963	-0.566918	-0.337663	-0.471892	0.0550556	0.0134863	0.01612	0.161844	-0.629192	-0.315908	-0.444796	-0.0278289	0.00642365	-0.0486771	-0.152208
19	C. elisae sp nov	-0.712956	-0.304787	-0.733072	0.062396	0.130752	0.181968	0.00859443	-0.270753	0.341372	0.434439	-0.0368336	-0.0556515	0.0677087	0.0486467	-0.0837685	-0.118885
20	C. elisae sp nov	-0.690556	-0.229754	-0.859072	0.133937	-0.0978684	0.0780481	-0.0812488	-0.0451452	0.337052	0.0481197	-0.607615	-0.0869809	-0.0254851	0.0113066	-0.0820561	-0.0748056
21	C. elisae sp nov	0.63049	0.0679741	-0.40938	0.0494432	0.255925	-0.27002	0.0358431	0.038586	-0.272984	0.263622	-0.473841	-0.0937971	0.157998	0.112633	-0.0932888	-0.0427196
22	C. elisae sp nov	-0.112556	-0.604921	0.150928	-0.143769	-0.144768	-0.16235	0.0779674	0.136817	-0.0913494	0.319715	-0.363709	-0.180334	0.390484	0.168007	-0.0906182	-0.0752046
23	C. elisae sp nov	0.419259	0.0610554	0.642159	0.0911488	0.56259	0.200453	0.183978	0.0892759	-0.396668	0.908911	0.27932	0.551402	0.528591	0.257102	0.299062	0.16365
24	C. marcoreyesi sp nov	0.261352	0.796512	0.681543	0.162161	0.160177	0.184317	0.118162	0.176738	0.663259	0.289916	0.666868	0.387769	-0.214442	-0.270246	0.186597	0.0478222
25	C. marcoreyesi sp nov	-0.627941	0.294566	0.560159	-0.0272978	-0.193384	0.0428779	0.131481	0.0691827	-0.233039	0.211876	0.751821	0.160979	0.0582239	-0.225378	0.114862	0.0854093
26	C. marcoreyesi sp nov	-0.506679	0.341582	-0.334918	-0.104568	0.193514	0.00356004	-0.408854	-0.428366	-0.538848	0.247453	0.675811	-0.316549	-0.94139	0.096603	0.118835	0.18363
27	C. marcoreyesi sp nov	-0.820679	-0.0201405	-0.384918	-0.303804	0.207881	0.0034273	-0.522449	-0.447712	-0.464982	-0.115348	0.29378	-0.297667	-0.3194	-0.0644969	0.00264754	-0.0131694
28	C. marcoreyesi sp nov	0.521721	0.404893	-0.000917949	0.367738	0.379261	0.169507	0.137708	0.027896	-1.1893	0.0983329	-0.477001	-0.388996	-0.322594	-0.161837	-0.10564	-0.0590896
29	C. marcoreyesi sp nov	1.24218	0.514953	0.456005	-0.129557	0.480867	-0.282501	0.192681	-0.0782509	0.0789943	0.355343	0.510426	0.231664	-0.00786114	-0.0795748	-0.0898416	0.0337731
30	C. marcoreyesi sp nov	-0.0969559	0.392101	-0.0730718	-0.980662	0.193284	0.112499	-0.137027	0.206631	-0.644093	-0.214356	-0.258708	-0.201181	0.12975	0.183046	-0.159019	0.0583133
