# Supplementary material for: Simplifying the Centrolene buckleyi complex (Amphibia: Anura: Centrolenidae): a taxonomic review and description of two new species
Source: PeerJ. 2024 Aug 20;12:e17712. doi: 10.7717/peerj.17712 (PMC11348905; doi:10.7717/peerj.17712)
Supplement: Supplemental Information 2 — Green: 0.0–3.0%, Blue: >3.0–5.0%, and Yellow >5.0%. [file peerj-12-17712-s002.xlsx]

## Sheet: MatrixOutput
		1	2	3	4	5	6	7	8	9	10	11	12	13	14	15	16	17	18	19	20	21	22	23	24	25	26	27	28	29	30	31	32	33	34	35	36	37	38	39	40	41	42	43	44	45	46	47	48
1	C. altitudinale MHNLS 17225	0
2	C. cf venezuelense MAR 371	0.0220994
3	C. venezuelense MHNLS 16497	0.0165289	0.00552486
4	C. venezuelense EBRG5244	0.0165289	0.00552486	0
5	C. notostictum MAR510	0.00550964	0.0248619	0.0220386	0.0220386
6	C. buckleyi MZUTI763	0.0165289	0.019337	0.0165289	0.0165289	0.0165289
7	C. buckleyi KU178031	0.0165289	0.019337	0.0165289	0.0165289	0.0165289	0
8	C. buckleyi DHMECN 867	0.0192837	0.0220994	0.0192837	0.0192837	0.0192837	0.00275482	0.00275482
9	C. buckleyi ZSFQ 4421	0.0165289	0.019337	0.0165289	0.0165289	0.0165289	0	0	0.00275482
10	C. buckleyi DHMECN 13828	0.0165289	0.019337	0.0165289	0.0165289	0.0165289	0	0	0.00275482	0
11	C. buckleyi ZSFQ 4420	0.0192837	0.0220994	0.0192837	0.0192837	0.0192837	0.00275482	0.00275482	0	0.00275482	0.00275482
12	C. buckleyi DHMEC 14180	0.0149701	0.015015	0.0149701	0.0149701	0.0149701	0	0	0.00299401	0	0	0.00299401
13	C. cf. elisae ZSFQ 2134	0.0220386	0.0110497	0.00550964	0.00550964	0.0275482	0.0220386	0.0220386	0.0247934	0.0220386	0.0220386	0.0247934	0.0209581
14	C. elisae sp. nov. ZSFQ 4228	0.0220386	0.0110497	0.00550964	0.00550964	0.0275482	0.0165289	0.0165289	0.0192837	0.0165289	0.0165289	0.0192837	0.0149701	0.00550964
15	C. elisae sp. nov. MZUTI 85	0.0220386	0.0110497	0.00550964	0.00550964	0.0275482	0.0165289	0.0165289	0.0192837	0.0165289	0.0165289	0.0192837	0.0149701	0.00550964	0
16	C. elisae sp. nov. MZUTI 83	0.0220386	0.0110497	0.00550964	0.00550964	0.0275482	0.0165289	0.0165289	0.0192837	0.0165289	0.0165289	0.0192837	0.0149701	0.00550964	0	0
17	C. elisae sp. nov. MZUTI 84	0.0220386	0.0110497	0.00550964	0.00550964	0.0275482	0.0165289	0.0165289	0.0192837	0.0165289	0.0165289	0.0192837	0.0149701	0.00550964	0	0	0
18	C. buckleyi CJ 2171	0.0110193	0.0248619	0.0220386	0.0220386	0.0110193	0.00550964	0.00550964	0.00826446	0.00550964	0.00550964	0.00826446	0.00598802	0.0275482	0.0220386	0.0220386	0.0220386	0.0220386
19	C. buckleyi CJ 4292	0.0110193	0.0248619	0.0220386	0.0220386	0.0110193	0.00550964	0.00550964	0.00826446	0.00550964	0.00550964	0.00826446	0.00598802	0.0275482	0.0220386	0.0220386	0.0220386	0.0220386	0
20	C. buckleyi CJ 1055	0.0110193	0.0248619	0.0220386	0.0220386	0.0110193	0.00550964	0.00550964	0.00826446	0.00550964	0.00550964	0.00826446	0.00598802	0.0275482	0.0220386	0.0220386	0.0220386	0.0220386	0	0
21	C. buckleyi ZSFQ 5366	0.0110193	0.0248619	0.0220386	0.0220386	0.0110193	0.00550964	0.00550964	0.00826446	0.00550964	0.00550964	0.00826446	0.00598802	0.0275482	0.0220386	0.0220386	0.0220386	0.0220386	0	0	0
22	C. buckleyi CJ 11305	0.0137741	0.0220994	0.0192837	0.0192837	0.0137741	0.00826446	0.00826446	0.0110193	0.00826446	0.00826446	0.0110193	0.00898204	0.0247934	0.0192837	0.0192837	0.0192837	0.0192837	0.00275482	0.00275482	0.00275482	0.00275482
23	C. buckleyi CJ 9789	0.0110193	0.0248619	0.0220386	0.0220386	0.0110193	0.00550964	0.00550964	0.00826446	0.00550964	0.00550964	0.00826446	0.00598802	0.0275482	0.0220386	0.0220386	0.0220386	0.0220386	0	0	0	0	0.00275482
24	C. marcoreyesi sp. nov. ZSFQ 4417 (MRy547)	0.0247934	0.0165746	0.0137741	0.0137741	0.0247934	0.0192837	0.0192837	0.0220386	0.0192837	0.0192837	0.0220386	0.0179641	0.0192837	0.0192837	0.0192837	0.0192837	0.0192837	0.0247934	0.0247934	0.0247934	0.0247934	0.0275482	0.0247934
25	C. marcoreyesi sp. nov. ZSFQ 4418 (MRy548)	0.0247934	0.0165746	0.0137741	0.0137741	0.0247934	0.0192837	0.0192837	0.0220386	0.0192837	0.0192837	0.0220386	0.0179641	0.0192837	0.0192837	0.0192837	0.0192837	0.0192837	0.0247934	0.0247934	0.0247934	0.0247934	0.0275482	0.0247934	0
26	C. marcoreyesi sp. nov. MUTPL 271	0.0247934	0.0165746	0.0137741	0.0137741	0.0247934	0.0192837	0.0192837	0.0220386	0.0192837	0.0192837	0.0220386	0.0179641	0.0192837	0.0192837	0.0192837	0.0192837	0.0192837	0.0247934	0.0247934	0.0247934	0.0247934	0.0275482	0.0247934	0	0
27	C. marcoreyesi sp. nov. CJ 11564	0.0247934	0.0165746	0.0137741	0.0137741	0.0247934	0.0192837	0.0192837	0.0220386	0.0192837	0.0192837	0.0220386	0.0179641	0.0192837	0.0192837	0.0192837	0.0192837	0.0192837	0.0247934	0.0247934	0.0247934	0.0247934	0.0275482	0.0247934	0	0	0
28	C. marcoreyesi sp. nov. CJ 12631	0.0275482	0.019337	0.0165289	0.0165289	0.0275482	0.0220386	0.0220386	0.0247934	0.0220386	0.0220386	0.0247934	0.0209581	0.0220386	0.0220386	0.0220386	0.0220386	0.0220386	0.0275482	0.0275482	0.0275482	0.0275482	0.030303	0.0275482	0.00275482	0.00275482	0.00275482	0.00275482
29	C. marcoreyesi sp. nov. CJ 11364	0.0275482	0.019337	0.0165289	0.0165289	0.0275482	0.0220386	0.0220386	0.0247934	0.0220386	0.0220386	0.0247934	0.0209581	0.0220386	0.0220386	0.0220386	0.0220386	0.0220386	0.0275482	0.0275482	0.0275482	0.0275482	0.030303	0.0275482	0.00275482	0.00275482	0.00275482	0.00275482	0
30	C. hesperia MHNSM 25802	0.0247934	0.019337	0.0137741	0.0137741	0.030303	0.0275482	0.0275482	0.030303	0.0275482	0.0275482	0.030303	0.0239521	0.0192837	0.0165289	0.0165289	0.0165289	0.0165289	0.0275482	0.0275482	0.0275482	0.0275482	0.0247934	0.0275482	0.0275482	0.0275482	0.0275482	0.0275482	0.030303	0.030303
31	C. hybrida MAR 347	0.0385675	0.0414365	0.0385675	0.0385675	0.0385675	0.0330579	0.0330579	0.0358127	0.0330579	0.0330579	0.0358127	0.0299401	0.0440771	0.0385675	0.0385675	0.0385675	0.0385675	0.0330579	0.0330579	0.0330579	0.0330579	0.0358127	0.0330579	0.0413223	0.0413223	0.0413223	0.0413223	0.0440771	0.0440771	0.0413223
32	C. pipilata KU 178154	0.0440771	0.0359116	0.0385675	0.0385675	0.0440771	0.0385675	0.0385675	0.0413223	0.0385675	0.0385675	0.0413223	0.0329341	0.0440771	0.0385675	0.0385675	0.0385675	0.0385675	0.0385675	0.0385675	0.0385675	0.0385675	0.0413223	0.0385675	0.0413223	0.0413223	0.0413223	0.0413223	0.0440771	0.0440771	0.0413223	0.0165289
33	C. sanchezi MUTPL 601	0.0413223	0.0359116	0.0358127	0.0358127	0.046832	0.046832	0.046832	0.0440771	0.046832	0.046832	0.0440771	0.0449102	0.0413223	0.0413223	0.0413223	0.0413223	0.0413223	0.046832	0.046832	0.046832	0.046832	0.0495868	0.046832	0.0440771	0.0440771	0.0440771	0.0440771	0.046832	0.046832	0.046832	0.0413223	0.030303
34	Centrolene sp. ZSFQ 4422	0.0220386	0.0165746	0.0137741	0.0137741	0.0220386	0.0165289	0.0165289	0.0192837	0.0165289	0.0165289	0.0192837	0.0149701	0.0192837	0.0192837	0.0192837	0.0192837	0.0192837	0.0220386	0.0220386	0.0220386	0.0220386	0.0247934	0.0220386	0.0137741	0.0137741	0.0137741	0.0137741	0.0165289	0.0165289	0.0275482	0.0413223	0.0413223	0.0385675
35	Centrolene sp. ZSFQ 4423	0.0220386	0.0165746	0.0137741	0.0137741	0.0220386	0.0165289	0.0165289	0.0192837	0.0165289	0.0165289	0.0192837	0.0149701	0.0192837	0.0192837	0.0192837	0.0192837	0.0192837	0.0220386	0.0220386	0.0220386	0.0220386	0.0247934	0.0220386	0.0137741	0.0137741	0.0137741	0.0137741	0.0165289	0.0165289	0.0275482	0.0413223	0.0413223	0.0385675	0
36	Centrolene sp. ZSFQ 621	0.0633609	0.0607735	0.0688705	0.0688705	0.0633609	0.0633609	0.0633609	0.0606061	0.0633609	0.0633609	0.0606061	0.0598802	0.0743802	0.0743802	0.0743802	0.0743802	0.0743802	0.0578512	0.0578512	0.0578512	0.0578512	0.0606061	0.0578512	0.0716253	0.0716253	0.0716253	0.0716253	0.0743802	0.0743802	0.077135	0.077135	0.0716253	0.0661157	0.0633609	0.0633609
37	C. zarza MUTPL 933	0.0633609	0.0607735	0.0688705	0.0688705	0.0633609	0.0633609	0.0633609	0.0606061	0.0633609	0.0633609	0.0606061	0.0598802	0.0743802	0.0743802	0.0743802	0.0743802	0.0743802	0.0578512	0.0578512	0.0578512	0.0578512	0.0606061	0.0578512	0.0716253	0.0716253	0.0716253	0.0716253	0.0743802	0.0743802	0.077135	0.0743802	0.0633609	0.0606061	0.0633609	0.0633609	0.00826446
38	C. aff. condor QCAZ 44896	0.0358127	0.038674	0.0413223	0.0413223	0.0358127	0.0358127	0.0358127	0.0385675	0.0358127	0.0358127	0.0385675	0.0359281	0.046832	0.046832	0.046832	0.046832	0.046832	0.030303	0.030303	0.030303	0.030303	0.0330579	0.030303	0.0440771	0.0440771	0.0440771	0.0440771	0.046832	0.046832	0.0495868	0.0578512	0.046832	0.0440771	0.0358127	0.0358127	0.0440771	0.0440771
39	C. heloderma QCAZ 40200	0.0165289	0.019337	0.0165289	0.0165289	0.0165289	0.0220386	0.0220386	0.0247934	0.0220386	0.0220386	0.0247934	0.0209581	0.0220386	0.0220386	0.0220386	0.0220386	0.0220386	0.0165289	0.0165289	0.0165289	0.0165289	0.0192837	0.0165289	0.0192837	0.0192837	0.0192837	0.0192837	0.0220386	0.0220386	0.0247934	0.0385675	0.0385675	0.0358127	0.0137741	0.0137741	0.0578512	0.0578512	0.030303
40	C. muelleri PV	0.0220386	0.019337	0.0165289	0.0165289	0.0220386	0.0165289	0.0165289	0.0192837	0.0165289	0.0165289	0.0192837	0.0149701	0.0220386	0.0220386	0.0220386	0.0220386	0.0220386	0.0220386	0.0220386	0.0220386	0.0220386	0.0247934	0.0220386	0.0137741	0.0137741	0.0137741	0.0137741	0.0165289	0.0165289	0.030303	0.0440771	0.0440771	0.0413223	0.00826446	0.00826446	0.0633609	0.0633609	0.030303	0.0165289
41	C. lynchi QCAZ 40191_92	0.0275482	0.019337	0.0165289	0.0165289	0.0275482	0.0220386	0.0220386	0.0192837	0.0220386	0.0220386	0.0192837	0.0209581	0.0220386	0.0220386	0.0220386	0.0220386	0.0220386	0.0275482	0.0275482	0.0275482	0.0275482	0.030303	0.0275482	0.0137741	0.0137741	0.0137741	0.0137741	0.0165289	0.0165289	0.030303	0.0440771	0.0440771	0.0413223	0.0165289	0.0165289	0.0661157	0.0661157	0.046832	0.0220386	0.0165289
42	C. huilense QCAZ 37230	0.0385675	0.0331492	0.030303	0.030303	0.0385675	0.0385675	0.0385675	0.0413223	0.0385675	0.0385675	0.0413223	0.0359281	0.0358127	0.0358127	0.0358127	0.0358127	0.0358127	0.0385675	0.0385675	0.0385675	0.0385675	0.0358127	0.0385675	0.0385675	0.0385675	0.0385675	0.0385675	0.0413223	0.0413223	0.0413223	0.0440771	0.046832	0.0550964	0.0385675	0.0385675	0.077135	0.0743802	0.0550964	0.030303	0.0358127	0.0330579
43	C. sabini MUSM 28018	0.0220386	0.0138122	0.0110193	0.0110193	0.0220386	0.0165289	0.0165289	0.0192837	0.0165289	0.0165289	0.0192837	0.0149701	0.0165289	0.0165289	0.0165289	0.0165289	0.0165289	0.0220386	0.0220386	0.0220386	0.0220386	0.0247934	0.0220386	0.00275482	0.00275482	0.00275482	0.00275482	0.00550964	0.00550964	0.0247934	0.0385675	0.0385675	0.0413223	0.0110193	0.0110193	0.0688705	0.0688705	0.0413223	0.0165289	0.0110193	0.0110193	0.0358127
44	C. cf. venezuelense IAvHCT42898	0.0220386	0	0.00550964	0.00550964	0.0275482	0.0220386	0.0220386	0.0247934	0.0220386	0.0220386	0.0247934	0.0179641	0.0110193	0.0110193	0.0110193	0.0110193	0.0110193	0.0275482	0.0275482	0.0275482	0.0275482	0.0247934	0.0275482	0.0192837	0.0192837	0.0192837	0.0192837	0.0220386	0.0220386	0.0192837	0.0440771	0.0385675	0.0358127	0.0192837	0.0192837	0.0633609	0.0633609	0.0413223	0.0220386	0.0220386	0.0220386	0.0358127	0.0165289
45	C. cf. venezuelense IAvHCT42907	0.0247934	0.00276243	0.00826446	0.00826446	0.030303	0.0247934	0.0247934	0.0275482	0.0247934	0.0247934	0.0275482	0.0209581	0.0137741	0.0137741	0.0137741	0.0137741	0.0137741	0.030303	0.030303	0.030303	0.030303	0.0275482	0.030303	0.0220386	0.0220386	0.0220386	0.0220386	0.0247934	0.0247934	0.0220386	0.046832	0.0413223	0.0385675	0.0220386	0.0220386	0.0661157	0.0661157	0.0440771	0.0247934	0.0247934	0.0247934	0.0385675	0.0192837	0.00275482
46	C. cf. venezuelense IAvHCT42900	0.0247934	0.00276243	0.00826446	0.00826446	0.030303	0.0247934	0.0247934	0.0275482	0.0247934	0.0247934	0.0275482	0.0209581	0.0137741	0.0137741	0.0137741	0.0137741	0.0137741	0.030303	0.030303	0.030303	0.030303	0.0275482	0.030303	0.0220386	0.0220386	0.0220386	0.0220386	0.0247934	0.0247934	0.0220386	0.046832	0.0413223	0.0385675	0.0220386	0.0220386	0.0661157	0.0661157	0.0440771	0.0247934	0.0247934	0.0247934	0.0385675	0.0192837	0.00275482	0.00550964
47	C. cf. venezuelense IAvHCT42904	0.0247934	0.00276243	0.00826446	0.00826446	0.030303	0.0247934	0.0247934	0.0275482	0.0247934	0.0247934	0.0275482	0.0209581	0.0137741	0.0137741	0.0137741	0.0137741	0.0137741	0.030303	0.030303	0.030303	0.030303	0.0275482	0.030303	0.0220386	0.0220386	0.0220386	0.0220386	0.0247934	0.0247934	0.0220386	0.046832	0.0413223	0.0385675	0.0220386	0.0220386	0.0661157	0.0661157	0.0440771	0.0247934	0.0247934	0.0247934	0.0385675	0.0192837	0.00275482	0.00550964	0
48	C. muelleri CORBIDI 14667	0.046832	0.0359116	0.0330579	0.0330579	0.046832	0.0413223	0.0413223	0.0440771	0.0413223	0.0413223	0.0440771	0.0389222	0.0385675	0.0385675	0.0385675	0.0385675	0.0385675	0.046832	0.046832	0.046832	0.046832	0.0440771	0.046832	0.0413223	0.0413223	0.0413223	0.0413223	0.0440771	0.0440771	0.0440771	0.0523416	0.0550964	0.0633609	0.0413223	0.0413223	0.0853994	0.0826446	0.0633609	0.0385675	0.0385675	0.0358127	0.00826446	0.0385675	0.0385675	0.0413223	0.0413223	0.0413223
49	C. antioquiense NRPS 014	0.0826446	0.0856354	0.0826446	0.0826446	0.0881543	0.077135	0.077135	0.0743802	0.077135	0.077135	0.0743802	0.0838323	0.0826446	0.0826446	0.0826446	0.0826446	0.0826446	0.077135	0.077135	0.077135	0.077135	0.0743802	0.077135	0.0964187	0.0964187	0.0964187	0.0964187	0.0991736	0.0991736	0.0881543	0.0881543	0.0909091	0.0853994	0.0881543	0.0881543	0.101928	0.101928	0.077135	0.0881543	0.0826446	0.0936639	0.0964187	0.0936639	0.0853994	0.0881543	0.0881543	0.0881543	0.104683
50	C. peristicta QCAZ 22312	0.0964187	0.0966851	0.0909091	0.0909091	0.101928	0.0909091	0.0909091	0.0881543	0.0909091	0.0909091	0.0881543	0.0988024	0.0853994	0.0853994	0.0853994	0.0853994	0.0853994	0.0909091	0.0909091	0.0909091	0.0909091	0.0881543	0.0909091	0.104683	0.104683	0.104683	0.104683	0.107438	0.107438	0.0964187	0.0909091	0.0936639	0.0936639	0.0991736	0.0991736	0.115702	0.112948	0.0964187	0.0964187	0.101928	0.101928	0.104683	0.101928	0.0964187	0.0991736	0.0991736	0.0991736	0.112948
51	C. aff. savagei MAR 1152	0.0991736	0.104972	0.104683	0.104683	0.104683	0.104683	0.104683	0.101928	0.104683	0.104683	0.101928	0.10479	0.0991736	0.0991736	0.0991736	0.0991736	0.0991736	0.0991736	0.0991736	0.0991736	0.0991736	0.0964187	0.0991736	0.118457	0.118457	0.118457	0.118457	0.121212	0.121212	0.0991736	0.104683	0.107438	0.118457	0.115702	0.115702	0.123967	0.121212	0.104683	0.110193	0.110193	0.115702	0.112948	0.115702	0.104683	0.107438	0.101928	0.101928	0.121212
52	C. daidalea MHUA 3271	0.0798898	0.0911602	0.0853994	0.0853994	0.0853994	0.0798898	0.0798898	0.077135	0.0798898	0.0798898	0.077135	0.0868263	0.0798898	0.0798898	0.0798898	0.0798898	0.0798898	0.0743802	0.0743802	0.0743802	0.0743802	0.0716253	0.0743802	0.0936639	0.0936639	0.0936639	0.0936639	0.0964187	0.0964187	0.0853994	0.0853994	0.0881543	0.0881543	0.0881543	0.0881543	0.0991736	0.0964187	0.077135	0.0853994	0.0798898	0.0881543	0.0909091	0.0909091	0.0909091	0.0936639	0.0936639	0.0936639	0.0991736
53	C. savagei MHUA 4094	0.0909091	0.10221	0.0964187	0.0964187	0.0964187	0.0964187	0.0964187	0.0936639	0.0964187	0.0964187	0.0936639	0.0988024	0.0909091	0.0909091	0.0909091	0.0909091	0.0909091	0.0909091	0.0909091	0.0909091	0.0909091	0.0881543	0.0909091	0.110193	0.110193	0.110193	0.110193	0.112948	0.112948	0.0909091	0.0936639	0.0964187	0.101928	0.101928	0.101928	0.110193	0.107438	0.0964187	0.0964187	0.101928	0.101928	0.0991736	0.107438	0.101928	0.104683	0.0991736	0.0991736	0.107438
54	C. charapita MHNC 13933	0.0991736	0.0911602	0.0936639	0.0936639	0.0991736	0.0991736	0.0991736	0.101928	0.0991736	0.0991736	0.101928	0.0928144	0.0991736	0.0991736	0.0991736	0.0991736	0.0991736	0.0991736	0.0991736	0.0991736	0.0991736	0.101928	0.0991736	0.0964187	0.0964187	0.0964187	0.0964187	0.0991736	0.0991736	0.0936639	0.0909091	0.0964187	0.0991736	0.0909091	0.0909091	0.107438	0.104683	0.101928	0.0826446	0.0936639	0.0936639	0.0936639	0.0936639	0.0936639	0.0964187	0.0964187	0.0964187	0.0964187
55	C. geckoidea KU 178015	0.0523416	0.0635359	0.0578512	0.0578512	0.0578512	0.0578512	0.0578512	0.0550964	0.0578512	0.0578512	0.0550964	0.0568862	0.0633609	0.0633609	0.0633609	0.0633609	0.0633609	0.0578512	0.0578512	0.0578512	0.0578512	0.0606061	0.0578512	0.0661157	0.0661157	0.0661157	0.0661157	0.0688705	0.0688705	0.0606061	0.0716253	0.0716253	0.0578512	0.0578512	0.0578512	0.077135	0.077135	0.0495868	0.0578512	0.0523416	0.0633609	0.077135	0.0633609	0.0633609	0.0661157	0.0661157	0.0661157	0.077135
[truncated: 6 more columns]

## Sheet: Sheet2
		1	2	3	4	5	6	7	8	9	10	11	12	13	14	15	16	17	18	19	20	21	22	23	24	25	26	27	28	29	30	31	32	33	34
1	C. cf venezuelense MAR 371
2	C. venezuelense MHNLS 16497	0.00552486
3	C. venezuelense EBRG5244	0.00552486	0
4	C. buckleyi MZUTI763	0.019337	0.0165289	0.0165289
5	C. buckleyi KU178031	0.019337	0.0165289	0.0165289	0
6	C. buckleyi DHMECN 867	0.0220994	0.0192837	0.0192837	0.00275482	0.00275482
7	C. buckleyi ZSFQ 4421	0.019337	0.0165289	0.0165289	0	0	0.00275482
8	C. buckleyi DHMECN 13828	0.019337	0.0165289	0.0165289	0	0	0.00275482	0
9	C. buckleyi ZSFQ 4420	0.0220994	0.0192837	0.0192837	0.00275482	0.00275482	0	0.00275482	0.00275482
10	C. buckleyi DHMEC 14180	0.015015	0.0149701	0.0149701	0	0	0.00299401	0	0	0.00299401
11	C. cf. elisae ZSFQ 2134	0.0110497	0.00550964	0.00550964	0.0220386	0.0220386	0.0247934	0.0220386	0.0220386	0.0247934	0.0209581
12	C. elisae sp. nov. ZSFQ 4228	0.0110497	0.00550964	0.00550964	0.0165289	0.0165289	0.0192837	0.0165289	0.0165289	0.0192837	0.0149701	0.00550964
13	C. elisae sp. nov. MZUTI 85	0.0110497	0.00550964	0.00550964	0.0165289	0.0165289	0.0192837	0.0165289	0.0165289	0.0192837	0.0149701	0.00550964	0
14	C. elisae sp. nov. MZUTI 83	0.0110497	0.00550964	0.00550964	0.0165289	0.0165289	0.0192837	0.0165289	0.0165289	0.0192837	0.0149701	0.00550964	0	0
15	C. elisae sp. nov. MZUTI 84	0.0110497	0.00550964	0.00550964	0.0165289	0.0165289	0.0192837	0.0165289	0.0165289	0.0192837	0.0149701	0.00550964	0	0	0
16	C. buckleyi CJ 2171	0.0248619	0.0220386	0.0220386	0.00550964	0.00550964	0.00826446	0.00550964	0.00550964	0.00826446	0.00598802	0.0275482	0.0220386	0.0220386	0.0220386	0.0220386
17	C. buckleyi CJ 4292	0.0248619	0.0220386	0.0220386	0.00550964	0.00550964	0.00826446	0.00550964	0.00550964	0.00826446	0.00598802	0.0275482	0.0220386	0.0220386	0.0220386	0.0220386	0
18	C. buckleyi CJ 1055	0.0248619	0.0220386	0.0220386	0.00550964	0.00550964	0.00826446	0.00550964	0.00550964	0.00826446	0.00598802	0.0275482	0.0220386	0.0220386	0.0220386	0.0220386	0	0
19	C. buckleyi ZSFQ 5366	0.0248619	0.0220386	0.0220386	0.00550964	0.00550964	0.00826446	0.00550964	0.00550964	0.00826446	0.00598802	0.0275482	0.0220386	0.0220386	0.0220386	0.0220386	0	0	0
20	C. buckleyi CJ 11305	0.0220994	0.0192837	0.0192837	0.00826446	0.00826446	0.0110193	0.00826446	0.00826446	0.0110193	0.00898204	0.0247934	0.0192837	0.0192837	0.0192837	0.0192837	0.00275482	0.00275482	0.00275482	0.00275482
21	C. buckleyi CJ 9789	0.0248619	0.0220386	0.0220386	0.00550964	0.00550964	0.00826446	0.00550964	0.00550964	0.00826446	0.00598802	0.0275482	0.0220386	0.0220386	0.0220386	0.0220386	0	0	0	0	0.00275482
22	C. marcoreyesi sp. nov. ZSFQ 4417 (MRy547)	0.0165746	0.0137741	0.0137741	0.0192837	0.0192837	0.0220386	0.0192837	0.0192837	0.0220386	0.0179641	0.0192837	0.0192837	0.0192837	0.0192837	0.0192837	0.0247934	0.0247934	0.0247934	0.0247934	0.0275482	0.0247934
23	C. marcoreyesi sp. nov. ZSFQ 4418 (MRy548)	0.0165746	0.0137741	0.0137741	0.0192837	0.0192837	0.0220386	0.0192837	0.0192837	0.0220386	0.0179641	0.0192837	0.0192837	0.0192837	0.0192837	0.0192837	0.0247934	0.0247934	0.0247934	0.0247934	0.0275482	0.0247934	0
24	C. marcoreyesi sp. nov. MUTPL 271	0.0165746	0.0137741	0.0137741	0.0192837	0.0192837	0.0220386	0.0192837	0.0192837	0.0220386	0.0179641	0.0192837	0.0192837	0.0192837	0.0192837	0.0192837	0.0247934	0.0247934	0.0247934	0.0247934	0.0275482	0.0247934	0	0
25	C. marcoreyesi sp. nov. CJ 11564	0.0165746	0.0137741	0.0137741	0.0192837	0.0192837	0.0220386	0.0192837	0.0192837	0.0220386	0.0179641	0.0192837	0.0192837	0.0192837	0.0192837	0.0192837	0.0247934	0.0247934	0.0247934	0.0247934	0.0275482	0.0247934	0	0	0
26	C. marcoreyesi sp. nov. CJ 12631	0.019337	0.0165289	0.0165289	0.0220386	0.0220386	0.0247934	0.0220386	0.0220386	0.0247934	0.0209581	0.0220386	0.0220386	0.0220386	0.0220386	0.0220386	0.0275482	0.0275482	0.0275482	0.0275482	0.030303	0.0275482	0.00275482	0.00275482	0.00275482	0.00275482
27	C. marcoreyesi sp. nov. CJ 11364	0.019337	0.0165289	0.0165289	0.0220386	0.0220386	0.0247934	0.0220386	0.0220386	0.0247934	0.0209581	0.0220386	0.0220386	0.0220386	0.0220386	0.0220386	0.0275482	0.0275482	0.0275482	0.0275482	0.030303	0.0275482	0.00275482	0.00275482	0.00275482	0.00275482	0
28	Centrolene sp. ZSFQ 4422	0.0165746	0.0137741	0.0137741	0.0165289	0.0165289	0.0192837	0.0165289	0.0165289	0.0192837	0.0149701	0.0192837	0.0192837	0.0192837	0.0192837	0.0192837	0.0220386	0.0220386	0.0220386	0.0220386	0.0247934	0.0220386	0.0137741	0.0137741	0.0137741	0.0137741	0.0165289	0.0165289
29	Centrolene sp. ZSFQ 4423	0.0165746	0.0137741	0.0137741	0.0165289	0.0165289	0.0192837	0.0165289	0.0165289	0.0192837	0.0149701	0.0192837	0.0192837	0.0192837	0.0192837	0.0192837	0.0220386	0.0220386	0.0220386	0.0220386	0.0247934	0.0220386	0.0137741	0.0137741	0.0137741	0.0137741	0.0165289	0.0165289	0
30	Centrolene sp. ZSFQ 621	0.0607735	0.0688705	0.0688705	0.0633609	0.0633609	0.0606061	0.0633609	0.0633609	0.0606061	0.0598802	0.0743802	0.0743802	0.0743802	0.0743802	0.0743802	0.0578512	0.0578512	0.0578512	0.0578512	0.0606061	0.0578512	0.0716253	0.0716253	0.0716253	0.0716253	0.0743802	0.0743802	0.0633609	0.0633609
31	C. cf. venezuelense IAvHCT42898	0	0.00550964	0.00550964	0.0220386	0.0220386	0.0247934	0.0220386	0.0220386	0.0247934	0.0179641	0.0110193	0.0110193	0.0110193	0.0110193	0.0110193	0.0275482	0.0275482	0.0275482	0.0275482	0.0247934	0.0275482	0.0192837	0.0192837	0.0192837	0.0192837	0.0220386	0.0220386	0.0192837	0.0192837	0.0633609
32	C. cf. venezuelense IAvHCT42907	0.00276243	0.00826446	0.00826446	0.0247934	0.0247934	0.0275482	0.0247934	0.0247934	0.0275482	0.0209581	0.0137741	0.0137741	0.0137741	0.0137741	0.0137741	0.030303	0.030303	0.030303	0.030303	0.0275482	0.030303	0.0220386	0.0220386	0.0220386	0.0220386	0.0247934	0.0247934	0.0220386	0.0220386	0.0661157	0.00275482
33	C. cf. venezuelense IAvHCT42900	0.00276243	0.00826446	0.00826446	0.0247934	0.0247934	0.0275482	0.0247934	0.0247934	0.0275482	0.0209581	0.0137741	0.0137741	0.0137741	0.0137741	0.0137741	0.030303	0.030303	0.030303	0.030303	0.0275482	0.030303	0.0220386	0.0220386	0.0220386	0.0220386	0.0247934	0.0247934	0.0220386	0.0220386	0.0661157	0.00275482	0.00550964
34	C. cf. venezuelense IAvHCT42904	0.00276243	0.00826446	0.00826446	0.0247934	0.0247934	0.0275482	0.0247934	0.0247934	0.0275482	0.0209581	0.0137741	0.0137741	0.0137741	0.0137741	0.0137741	0.030303	0.030303	0.030303	0.030303	0.0275482	0.030303	0.0220386	0.0220386	0.0220386	0.0220386	0.0247934	0.0247934	0.0220386	0.0220386	0.0661157	0.00275482	0.00550964	0

## Sheet: Caption
Table. Estimates of Evolutionary Divergence between Sequences
The number of base differences per site from between sequences are shown. This analysis involved 67 nucleotide sequences. Codon positions included were 1st+2nd+3rd+Noncoding. All positions with less than 95% site coverage were eliminated, i.e., fewer than 5% alignment gaps, missing data, and ambiguous bases were allowed at any position (partial deletion option). There were a total of 363 position…
1. Tamura K., Stecher G., and Kumar S. (2021). MEGA 11: Molecular Evolutionary Genetics Analysis Version 11. Molecular Biology and Evolution https://doi.org/10.1093/molbev/msab120.
Disclaimer: Although utmost care has been taken to ensure the correctness of the caption, the caption text is provided "as is" without any warranty of any kind. Authors advise the user to carefully check the caption prior to its use for any purpose and report any errors or problems to the authors immediately (www.megasoftware.net). In no event shall the authors and their employers be liable for a…
